# Supplementary material for: Estrogen differentially regulates transcriptional landscapes of preoptic and arcuate kisspeptin neuron populations
Source: Front Endocrinol (Lausanne). 2022 Aug 25;13:960769. doi: 10.3389/fendo.2022.960769 (PMC9454256; doi:10.3389/fendo.2022.960769)
Supplement: Supplementary file 1 [file DataSheet_1.xlsx]

## Sheet: Table 1
Table 1. Full list of transcripts responding to estrogen treatment in RP3V kisspeptin neurons (ranked by fold change; FC)
Ensembl	Gene symbol	Gene description	Basemean (CPM)	log2FC	pvalue	padj
ENSMUSG00000025723	Nmb	neuromedin B [Source:MGI Symbol;Acc:MGI:1915289]	67.9964	9.20601	8.38716e-15	6.83414e-12
ENSMUSG00000020059	Sycp3	synaptonemal complex protein 3 [Source:MGI Symbol;Acc:MGI:109542]	16.023	4.83413	0.000258246	0.0168342
ENSMUSG00000020844	Nxn	nucleoredoxin [Source:MGI Symbol;Acc:MGI:109331]	41.7874	4.66973	2.02233e-15	1.97743e-12
ENSMUSG00000044217	Aqp5	aquaporin 5 [Source:MGI Symbol;Acc:MGI:106215]	27.1293	4.44825	5.83483e-08	1.39154e-05
ENSMUSG00000036907	C1ql2	complement component 1, q subcomponent-like 2 [Source:MGI Symbol;Acc:MGI:3032521]	84.899	4.07294	0.000234798	0.0159434
ENSMUSG00000052397	Ezr	ezrin [Source:MGI Symbol;Acc:MGI:98931]	50.6598	3.83375	1.82621e-15	1.97743e-12
ENSMUSG00000033578	Tmem35a	transmembrane protein 35A [Source:MGI Symbol;Acc:MGI:1914814]	102.852	3.59813	1.36623e-15	1.66987e-12
ENSMUSG00000029919	Hpgds	hematopoietic prostaglandin D synthase [Source:MGI Symbol;Acc:MGI:1859384]	20.3049	3.29838	0.00029868	0.0189102
ENSMUSG00000048490	Nrip1	nuclear receptor interacting protein 1 [Source:MGI Symbol;Acc:MGI:1315213]	87.1374	3.1041	1.10257e-16	1.54014e-13
ENSMUSG00000031255	Sytl4	synaptotagmin-like 4 [Source:MGI Symbol;Acc:MGI:1351606]	23.9453	3.07018	4.0769e-06	0.000546081
ENSMUSG00000104343	5730408A14Rik	RIKEN cDNA 5730408A14 gene [Source:MGI Symbol;Acc:MGI:1917766]	19.3032	3.06971	0.00047429	0.0259592
ENSMUSG00000111602	Gm32014	predicted gene, 32014 [Source:MGI Symbol;Acc:MGI:5591173]	29.4835	3.04338	7.46496e-06	0.0009358
ENSMUSG00000098306	Gm28040	predicted gene, 28040 [Source:MGI Symbol;Acc:MGI:5547776]	391.018	2.97836	0.00117415	0.0474416
ENSMUSG00000115958	Kiss1	predicted gene, 28040 [Source:MGI Symbol;Acc:MGI:5547776]	397.708	2.97654	0.00109026	0.0451719
ENSMUSG00000033327	Tnxb	tenascin XB [Source:MGI Symbol;Acc:MGI:1932137]	221.991	2.80591	5.60577e-28	1.82711e-24
ENSMUSG00000034640	Tiparp	TCDD-inducible poly(ADP-ribose) polymerase [Source:MGI Symbol;Acc:MGI:2159210]	26.1069	2.78703	4.09289e-07	6.90005e-05
ENSMUSG00000078117	Gm16485	predicted gene 16485 [Source:MGI Symbol;Acc:MGI:3642771]	117.78	2.71817	1.76348e-18	2.87389e-15
ENSMUSG00000067931	Zfp948	zinc finger protein 948 [Source:MGI Symbol;Acc:MGI:3040683]	22.1955	2.53687	0.00117096	0.0474416
ENSMUSG00000084390	Gm15425	predicted gene 15425 [Source:MGI Symbol;Acc:MGI:3705642]	29.3208	2.53639	9.95322e-07	0.000156972
ENSMUSG00000044712	Slc38a6	solute carrier family 38, member 6 [Source:MGI Symbol;Acc:MGI:3648156]	28.823	2.48743	0.000387315	0.0226776
ENSMUSG00000022483	Col2a1	collagen, type II, alpha 1 [Source:MGI Symbol;Acc:MGI:88452]	23.2068	2.45481	6.15771e-05	0.0056802
ENSMUSG00000019890	Nts	neurotensin [Source:MGI Symbol;Acc:MGI:1328351]	147.573	2.3251	4.08423e-09	1.24799e-06
ENSMUSG00000042500	Ago4	argonaute RISC catalytic subunit 4 [Source:MGI Symbol;Acc:MGI:1924100]	25.6573	2.31655	0.000726456	0.0356171
ENSMUSG00000040543	Pitpnm3	PITPNM family member 3 [Source:MGI Symbol;Acc:MGI:2685726]	105.293	2.29454	3.42544e-09	1.11646e-06
ENSMUSG00000036006	Ripor2	RHO family interacting cell polarization regulator 2 [Source:MGI Symbol;Acc:MGI:2444879]	48.3944	2.22708	4.28693e-05	0.00419176
ENSMUSG00000051136	Ghsr	growth hormone secretagogue receptor [Source:MGI Symbol;Acc:MGI:2441906]	35.481	2.22163	0.000210888	0.0146246
ENSMUSG00000044499	Hs3st5	heparan sulfate (glucosamine) 3-O-sulfotransferase 5 [Source:MGI Symbol;Acc:MGI:2441996]	41.0413	2.1475	0.000128631	0.0101432
ENSMUSG00000031870	Pgr	progesterone receptor [Source:MGI Symbol;Acc:MGI:97567]	273.827	2.14721	4.67488e-33	4.5711e-29
ENSMUSG00000030525	Chrna7	cholinergic receptor, nicotinic, alpha polypeptide 7 [Source:MGI Symbol;Acc:MGI:99779]	44.8352	2.11473	1.70473e-05	0.00193824
ENSMUSG00000039934	Gsap	gamma-secretase activating protein [Source:MGI Symbol;Acc:MGI:2442259]	50.4914	2.05783	8.32988e-07	0.000133524
ENSMUSG00000034875	Nudt19	nudix (nucleoside diphosphate linked moiety X)-type motif 19 [Source:MGI Symbol;Acc:MGI:94203]	31.8668	2.02961	0.00101126	0.0431334
ENSMUSG00000000056	Narf	nuclear prelamin A recognition factor [Source:MGI Symbol;Acc:MGI:1914858]	28.1538	1.91157	0.000555002	0.0293341
ENSMUSG00000002014	Ssr4	signal sequence receptor, delta [Source:MGI Symbol;Acc:MGI:1099464]	52.197	1.87562	0.00013089	0.0101575
ENSMUSG00000097057	Gm17638	predicted gene, 17638 [Source:MGI Symbol;Acc:MGI:4937272]	34.903	1.86382	0.000323925	0.0197959
ENSMUSG00000066607	6030419C18Rik	inhibitory synaptic factor 1 [Source:MGI Symbol;Acc:MGI:2442108]	42.7291	1.86284	1.02999e-05	0.0012282
ENSMUSG00000037805	Rpl10a	ribosomal protein L10A [Source:MGI Symbol;Acc:MGI:1343877]	26.8344	1.80192	0.000224953	0.0153817
ENSMUSG00000042401	Crtac1	cartilage acidic protein 1 [Source:MGI Symbol;Acc:MGI:1920082]	67.7425	1.7885	7.90101e-07	0.00012876
ENSMUSG00000021730	Hcn1	hyperpolarization activated cyclic nucleotide gated potassium channel 1 [Source:MGI Symbol;Acc:MGI:1096392]	237.238	1.78733	6.08315e-10	2.28773e-07
ENSMUSG00000022656	Nectin3	nectin cell adhesion molecule 3 [Source:MGI Symbol;Acc:MGI:1930171]	51.4978	1.76058	4.64819e-05	0.00445588
ENSMUSG00000037946	Fgd3	FYVE, RhoGEF and PH domain containing 3 [Source:MGI Symbol;Acc:MGI:1353657]	41.2706	1.739	0.000448096	0.0248948
ENSMUSG00000022425	Enpp2	ectonucleotide pyrophosphatase/phosphodiesterase 2 [Source:MGI Symbol;Acc:MGI:1321390]	165.427	1.71669	3.31737e-09	1.11646e-06
ENSMUSG00000027849	Syt6	synaptotagmin VI [Source:MGI Symbol;Acc:MGI:1859544]	174.374	1.68862	3.63043e-07	6.45424e-05
ENSMUSG00000034295	Fhod3	formin homology 2 domain containing 3 [Source:MGI Symbol;Acc:MGI:1925847]	118.827	1.67729	4.12357e-10	1.68001e-07
ENSMUSG00000030854	Ptpn5	protein tyrosine phosphatase, non-receptor type 5 [Source:MGI Symbol;Acc:MGI:97807]	247.676	1.67715	1.46585e-10	6.51504e-08
ENSMUSG00000031934	Panx1	pannexin 1 [Source:MGI Symbol;Acc:MGI:1860055]	26.9112	1.66242	0.00100834	0.0431334
ENSMUSG00000009905	Kdsr	3-ketodihydrosphingosine reductase [Source:MGI Symbol;Acc:MGI:1918000]	39.1353	1.64155	0.000169215	0.0125348
ENSMUSG00000021703	Serinc5	serine incorporator 5 [Source:MGI Symbol;Acc:MGI:2444223]	65.7245	1.63177	4.89726e-06	0.000638472
ENSMUSG00000023826	Park2	parkin RBR E3 ubiquitin protein ligase [Source:MGI Symbol;Acc:MGI:1355296]	50.237	1.60053	0.000886434	0.0399031
ENSMUSG00000050963	Kcns2	K+ voltage-gated channel, subfamily S, 2 [Source:MGI Symbol;Acc:MGI:1197011]	36.7449	1.596	0.00019773	0.0140102
ENSMUSG00000031303	Map3k15	mitogen-activated protein kinase kinase kinase 15 [Source:MGI Symbol;Acc:MGI:2448588]	128.157	1.59153	6.55965e-08	1.52715e-05
ENSMUSG00000020346	Mgat1	mannoside acetylglucosaminyltransferase 1 [Source:MGI Symbol;Acc:MGI:96973]	81.4989	1.58501	8.86264e-06	0.00107648
ENSMUSG00000034361	Cpne2	copine II [Source:MGI Symbol;Acc:MGI:2387578]	36.456	1.58124	0.0008916	0.0399031
ENSMUSG00000025810	Nrp1	neuropilin 1 [Source:MGI Symbol;Acc:MGI:106206]	127.576	1.57533	0.000263771	0.0169681
ENSMUSG00000000776	Polr3d	polymerase (RNA) III (DNA directed) polypeptide D [Source:MGI Symbol;Acc:MGI:1914315]	30.8722	1.57157	0.000657221	0.0331253
ENSMUSG00000052981	Ube2ql1	ubiquitin-conjugating enzyme E2Q family-like 1 [Source:MGI Symbol;Acc:MGI:1924230]	44.31	1.54549	0.000144465	0.0110358
ENSMUSG00000070738	Dgkd	diacylglycerol kinase, delta [Source:MGI Symbol;Acc:MGI:2138334]	174.996	1.52899	3.58602e-10	1.52453e-07
ENSMUSG00000045573	Penk	preproenkephalin [Source:MGI Symbol;Acc:MGI:104629]	378.014	1.51327	8.99862e-14	6.28489e-11
ENSMUSG00000037239	Spred3	sprouty-related EVH1 domain containing 3 [Source:MGI Symbol;Acc:MGI:2142186]	59.7516	1.50404	0.000309725	0.0191677
ENSMUSG00000037428	Vgf	VGF nerve growth factor inducible [Source:MGI Symbol;Acc:MGI:1343180]	372.947	1.47184	1.07932e-09	3.90872e-07
ENSMUSG00000023984	Gm20517	predicted gene 20517 [Source:MGI Symbol;Acc:MGI:5141982]	37.8926	1.46487	0.000767078	0.036948
ENSMUSG00000026626	Ppp2r5a	protein phosphatase 2, regulatory subunit B', alpha [Source:MGI Symbol;Acc:MGI:2388479]	54.2915	1.46319	0.000514313	0.0273313
ENSMUSG00000044770	Scml4	Scm polycomb group protein like 4 [Source:MGI Symbol;Acc:MGI:2446140]	77.2039	1.46029	0.000129845	0.010157
ENSMUSG00000060002	Chpt1	choline phosphotransferase 1 [Source:MGI Symbol;Acc:MGI:2384841]	126.622	1.44354	3.09147e-05	0.00314879
ENSMUSG00000027195	Hsd17b12	hydroxysteroid (17-beta) dehydrogenase 12 [Source:MGI Symbol;Acc:MGI:1926967]	57.4185	1.44112	0.00011411	0.00929806
ENSMUSG00000032511	Scn5a	sodium channel, voltage-gated, type V, alpha [Source:MGI Symbol;Acc:MGI:98251]	61.1878	1.44042	3.5189e-06	0.000477886
ENSMUSG00000048721	Fndc9	fibronectin type III domain containing 9 [Source:MGI Symbol;Acc:MGI:2443410]	153.867	1.42763	4.99614e-07	8.28004e-05
ENSMUSG00000040147	Maob	monoamine oxidase B [Source:MGI Symbol;Acc:MGI:96916]	60.3247	1.41926	0.000619575	0.0317183
ENSMUSG00000025151	Maged1	MAGE family member D1 [Source:MGI Symbol;Acc:MGI:1930187]	1903.06	1.41042	4.51359e-30	2.2067e-26
ENSMUSG00000037747	Phyhipl	phytanoyl-CoA hydroxylase interacting protein-like [Source:MGI Symbol;Acc:MGI:1918161]	134.637	1.40659	3.45682e-07	6.27018e-05
ENSMUSG00000052889	Prkcb	protein kinase C, beta [Source:MGI Symbol;Acc:MGI:97596]	100.129	1.40563	5.29008e-06	0.000680611
ENSMUSG00000101840	Gm28294	predicted gene 28294 [Source:MGI Symbol;Acc:MGI:5579000]	95.1501	1.40079	0.00012262	0.0099089
ENSMUSG00000021728	Emb	embigin [Source:MGI Symbol;Acc:MGI:95321]	98.4473	1.39428	3.30262e-06	0.000470769
ENSMUSG00000022037	Clu	clusterin [Source:MGI Symbol;Acc:MGI:88423]	395.416	1.33968	3.26909e-09	1.11646e-06
ENSMUSG00000117081		predicted gene, 49948 [Source:MGI Symbol;Acc:MGI:6270666]	148.646	1.32968	2.36733e-06	0.000350724
ENSMUSG00000071379	Hpcal1	hippocalcin-like 1 [Source:MGI Symbol;Acc:MGI:1855689]	169.365	1.31481	2.68621e-11	1.45921e-08
ENSMUSG00000090223	Pcp4	Purkinje cell protein 4 [Source:MGI Symbol;Acc:MGI:97509]	304.286	1.27553	8.54894e-09	2.38833e-06
ENSMUSG00000031353	Rbbp7	retinoblastoma binding protein 7, chromatin remodeling factor [Source:MGI Symbol;Acc:MGI:1194910]	175.713	1.27044	4.75552e-08	1.16249e-05
ENSMUSG00000063760	Rnf217	ring finger protein 217 [Source:MGI Symbol;Acc:MGI:3610311]	76.6843	1.27015	3.6761e-05	0.00366784
ENSMUSG00000039286	Fndc3b	fibronectin type III domain containing 3B [Source:MGI Symbol;Acc:MGI:1919257]	57.7548	1.22597	0.00103394	0.043577
ENSMUSG00000025812	Pard3	par-3 family cell polarity regulator [Source:MGI Symbol;Acc:MGI:2135608]	103.274	1.19748	3.43136e-06	0.000472561
ENSMUSG00000062014	Gmfb	glia maturation factor, beta [Source:MGI Symbol;Acc:MGI:1927133]	134.813	1.16163	4.07346e-05	0.00402326
ENSMUSG00000030662	Ipo5	importin 5 [Source:MGI Symbol;Acc:MGI:1917822]	189.613	1.15954	7.24923e-09	2.08479e-06
ENSMUSG00000087408	Cers1	ceramide synthase 1 [Source:MGI Symbol;Acc:MGI:2136690]	98.3908	1.15494	3.1559e-06	0.000460573
ENSMUSG00000031841	Cdh13	cadherin 13 [Source:MGI Symbol;Acc:MGI:99551]	81.419	1.1488	0.000258143	0.0168342
ENSMUSG00000063524	Eno1	enolase 1, alpha non-neuron [Source:MGI Symbol;Acc:MGI:95393]	76.739	1.12575	0.000137331	0.0105734
ENSMUSG00000033917	Gde1	glycerophosphodiester phosphodiesterase 1 [Source:MGI Symbol;Acc:MGI:1891827]	70.0169	1.12183	0.000796439	0.0376212
ENSMUSG00000021518	Ptdss1	phosphatidylserine synthase 1 [Source:MGI Symbol;Acc:MGI:1276575]	63.0993	1.09014	0.000299762	0.0189102
ENSMUSG00000027422	Rrbp1	ribosome binding protein 1 [Source:MGI Symbol;Acc:MGI:1932395]	63.7598	1.08901	0.000803855	0.0377889
ENSMUSG00000058301	Upf1	UPF1 regulator of nonsense transcripts homolog (yeast) [Source:MGI Symbol;Acc:MGI:107995]	75.6363	1.08412	7.35768e-05	0.00644994
ENSMUSG00000026594	Ralgps2	Ral GEF with PH domain and SH3 binding motif 2 [Source:MGI Symbol;Acc:MGI:1925505]	174.316	1.05214	9.368e-05	0.00782909
ENSMUSG00000004031	Brinp2	bone morphogenic protein/retinoic acid inducible neural-specific 2 [Source:MGI Symbol;Acc:MGI:2443333]	181.314	1.04588	0.000871465	0.0398561
ENSMUSG00000038936	Sccpdh	saccharopine dehydrogenase (putative) [Source:MGI Symbol;Acc:MGI:1924486]	120.275	1.04422	0.00108706	0.0451719
ENSMUSG00000041351	Rap1gap	Rap1 GTPase-activating protein [Source:MGI Symbol;Acc:MGI:109338]	343.149	1.04273	5.22925e-09	1.54944e-06
ENSMUSG00000031299	Pdha1	pyruvate dehydrogenase E1 alpha 1 [Source:MGI Symbol;Acc:MGI:97532]	108.341	1.03584	0.000108226	0.00889275
ENSMUSG00000026223	Itm2c	integral membrane protein 2C [Source:MGI Symbol;Acc:MGI:1927594]	1163.05	1.03159	6.49264e-15	5.77136e-12
ENSMUSG00000022454	Nell2	NEL-like 2 [Source:MGI Symbol;Acc:MGI:1858510]	301.887	1.00858	1.00878e-07	2.24179e-05
ENSMUSG00000042700	Sipa1l1	signal-induced proliferation-associated 1 like 1 [Source:MGI Symbol;Acc:MGI:2443679]	146.299	1.00755	0.000128211	0.0101432
ENSMUSG00000057378	Ryr3	ryanodine receptor 3 [Source:MGI Symbol;Acc:MGI:99684]	138.627	0.995175	0.000497432	0.0267318
ENSMUSG00000007458	M6pr	mannose-6-phosphate receptor, cation dependent [Source:MGI Symbol;Acc:MGI:96904]	104.414	0.99485	0.000629387	0.0318868
ENSMUSG00000028469	Npr2	natriuretic peptide receptor 2 [Source:MGI Symbol;Acc:MGI:97372]	165.287	0.986933	4.3089e-06	0.000569358
ENSMUSG00000022895	Ets2	E26 avian leukemia oncogene 2, 3' domain [Source:MGI Symbol;Acc:MGI:95456]	121.215	0.984362	0.000443489	0.0248948
ENSMUSG00000042331	Specc1	sperm antigen with calponin homology and coiled-coil domains 1 [Source:MGI Symbol;Acc:MGI:2442356]	86.2515	0.981093	0.00120423	0.0480612
ENSMUSG00000054414	Slc30a7	solute carrier family 30 (zinc transporter), member 7 [Source:MGI Symbol;Acc:MGI:1913750]	73.9077	0.979564	0.000242159	0.0160431
ENSMUSG00000021194	Chga	chromogranin A [Source:MGI Symbol;Acc:MGI:88394]	103.897	0.974837	0.00116345	0.0474416
ENSMUSG00000026204	Ptprn	protein tyrosine phosphatase, receptor type, N [Source:MGI Symbol;Acc:MGI:102765]	996.412	0.971179	9.64598e-12	5.8949e-09
ENSMUSG00000042066	Tmcc2	transmembrane and coiled-coil domains 2 [Source:MGI Symbol;Acc:MGI:1916125]	78.2734	0.962435	0.000332921	0.0202192
ENSMUSG00000050711	Scg2	secretogranin II [Source:MGI Symbol;Acc:MGI:103033]	3317.97	0.952379	1.28595e-07	2.73348e-05
ENSMUSG00000011179	Odc1	ornithine decarboxylase, structural 1 [Source:MGI Symbol;Acc:MGI:97402]	102.823	0.930584	0.000962691	0.0418364
ENSMUSG00000001270	Ckb	creatine kinase, brain [Source:MGI Symbol;Acc:MGI:88407]	322.258	0.92919	1.4352e-07	2.92363e-05
ENSMUSG00000031703	Itfg1	integrin alpha FG-GAP repeat containing 1 [Source:MGI Symbol;Acc:MGI:106419]	419.475	0.925665	2.45616e-07	4.80326e-05
ENSMUSG00000025089	Gfra1	glial cell line derived neurotrophic factor family receptor alpha 1 [Source:MGI Symbol;Acc:MGI:1100842]	201.308	0.92522	3.57372e-05	0.00360246
ENSMUSG00000020042	Btbd11	BTB (POZ) domain containing 11 [Source:MGI Symbol;Acc:MGI:1921257]	164.315	0.912258	2.62969e-05	0.00276485
ENSMUSG00000026833	Olfm1	olfactomedin 1 [Source:MGI Symbol;Acc:MGI:1860437]	138.472	0.911208	0.000167608	0.0125105
ENSMUSG00000001175	Calm1	calmodulin 1 [Source:MGI Symbol;Acc:MGI:88251]	1409.83	0.896682	1.56796e-14	1.17935e-11
ENSMUSG00000036093	Arl5a	ADP-ribosylation factor-like 5A [Source:MGI Symbol;Acc:MGI:1922673]	113.009	0.886467	0.000409751	0.0238485
ENSMUSG00000039501	Znfx1	zinc finger, NFX1-type containing 1 [Source:MGI Symbol;Acc:MGI:2138982]	75.6184	0.882685	0.00103203	0.043577
ENSMUSG00000033161	Atp1a1	ATPase, Na+/K+ transporting, alpha 1 polypeptide [Source:MGI Symbol;Acc:MGI:88105]	352.573	0.858116	3.84679e-09	1.21335e-06
ENSMUSG00000020023	Tmcc3	transmembrane and coiled coil domains 3 [Source:MGI Symbol;Acc:MGI:2442900]	214.078	0.845728	2.12199e-05	0.00235782
ENSMUSG00000007891	Ctsd	cathepsin D [Source:MGI Symbol;Acc:MGI:88562]	255.994	0.845632	0.000703809	0.0351114
ENSMUSG00000022995	Enah	ENAH actin regulator [Source:MGI Symbol;Acc:MGI:108360]	721.475	0.840247	1.32911e-07	2.76511e-05
ENSMUSG00000024943	Smc5	structural maintenance of chromosomes 5 [Source:MGI Symbol;Acc:MGI:2385088]	118.991	0.832612	0.000662391	0.0332147
ENSMUSG00000032076	Cadm1	cell adhesion molecule 1 [Source:MGI Symbol;Acc:MGI:1889272]	603.722	0.82381	3.2756e-08	8.51227e-06
ENSMUSG00000026247	Ecel1	endothelin converting enzyme-like 1 [Source:MGI Symbol;Acc:MGI:1343461]	200.529	0.816732	1.22466e-05	0.00142556
ENSMUSG00000036760	Kcnk9	potassium channel, subfamily K, member 9 [Source:MGI Symbol;Acc:MGI:3521816]	318.309	0.814906	1.84128e-07	3.67429e-05
ENSMUSG00000022514	Il1rap	interleukin 1 receptor accessory protein [Source:MGI Symbol;Acc:MGI:104975]	104.443	0.781515	0.000932508	0.0411486
ENSMUSG00000046449	Nexmif	neurite extension and migration factor [Source:MGI Symbol;Acc:MGI:2148050]	185.067	0.7803	0.000239785	0.0160431
ENSMUSG00000030077	Chl1	cell adhesion molecule L1-like [Source:MGI Symbol;Acc:MGI:1098266]	266.862	0.779207	0.000872286	0.0398561
ENSMUSG00000051675	Trim32	tripartite motif-containing 32 [Source:MGI Symbol;Acc:MGI:1917057]	137.909	0.744525	0.000893719	0.0399031
ENSMUSG00000055320	Tead1	TEA domain family member 1 [Source:MGI Symbol;Acc:MGI:101876]	244.614	0.712192	2.68448e-05	0.00279243
ENSMUSG00000020220	Vps13d	vacuolar protein sorting 13D [Source:MGI Symbol;Acc:MGI:2448530]	476.973	0.706317	2.30672e-06	0.000347002
ENSMUSG00000062901	Klhl24	kelch-like 24 [Source:MGI Symbol;Acc:MGI:1923035]	196.708	0.697115	0.000189426	0.0135639
ENSMUSG00000051375	Pcdh1	protocadherin 1 [Source:MGI Symbol;Acc:MGI:104692]	180.392	0.667835	0.000767001	0.036948
ENSMUSG00000013663	Pten	phosphatase and tensin homolog [Source:MGI Symbol;Acc:MGI:109583]	198.235	0.658759	0.000747205	0.0363491
ENSMUSG00000069769	Msi2	musashi RNA-binding protein 2 [Source:MGI Symbol;Acc:MGI:1923876]	278.538	0.645799	7.40263e-05	0.00644994
ENSMUSG00000043411	Usp48	ubiquitin specific peptidase 48 [Source:MGI Symbol;Acc:MGI:2158502]	263.109	0.623476	0.00029551	0.0188856
ENSMUSG00000097451	Rian	RNA imprinted and accumulated in nucleus [Source:MGI Symbol;Acc:MGI:1922995]	2264.85	0.621832	3.60552e-08	9.03969e-06
ENSMUSG00000063063	Ctnna2	catenin (cadherin associated protein), alpha 2 [Source:MGI Symbol;Acc:MGI:88275]	206.383	0.614537	0.000950344	0.0414842
ENSMUSG00000034390	Cmip	c-Maf inducing protein [Source:MGI Symbol;Acc:MGI:1921690]	303.426	0.607408	0.00018499	0.0134455
ENSMUSG00000061576	Dpp6	dipeptidylpeptidase 6 [Source:MGI Symbol;Acc:MGI:94921]	375.362	0.581045	5.95024e-05	0.00554109
ENSMUSG00000058153	Sez6l	seizure related 6 homolog like [Source:MGI Symbol;Acc:MGI:1935121]	547.246	0.572744	4.5486e-05	0.00440358
ENSMUSG00000022708	Zbtb20	zinc finger and BTB domain containing 20 [Source:MGI Symbol;Acc:MGI:1929213]	940.795	0.570972	1.06171e-05	0.00125077
ENSMUSG00000026787	Gad2	glutamic acid decarboxylase 2 [Source:MGI Symbol;Acc:MGI:95634]	434.611	0.568076	2.98584e-05	0.00307321
ENSMUSG00000055254	Ntrk2	neurotrophic tyrosine kinase, receptor, type 2 [Source:MGI Symbol;Acc:MGI:97384]	528.305	0.565342	2.55844e-05	0.00274906
ENSMUSG00000022822	Abcc5	ATP-binding cassette, sub-family C (CFTR/MRP), member 5 [Source:MGI Symbol;Acc:MGI:1351644]	327.719	0.564375	0.000308401	0.0191677
ENSMUSG00000016349	Eef1a2	eukaryotic translation elongation factor 1 alpha 2 [Source:MGI Symbol;Acc:MGI:1096317]	335.787	0.558948	7.33471e-05	0.00644994
ENSMUSG00000021268	Meg3	maternally expressed 3 [Source:MGI Symbol;Acc:MGI:1202886]	7187.7	0.536151	2.38287e-05	0.00261794
ENSMUSG00000057230	Aak1	AP2 associated kinase 1 [Source:MGI Symbol;Acc:MGI:1098687]	547.502	0.531588	0.000564034	0.0294926
ENSMUSG00000022892	App	amyloid beta (A4) precursor protein [Source:MGI Symbol;Acc:MGI:88059]	1211.43	0.514621	2.63785e-07	4.96018e-05
ENSMUSG00000037742	Eef1a1	eukaryotic translation elongation factor 1 alpha 1 [Source:MGI Symbol;Acc:MGI:1096881]	1125.54	0.500875	0.000124609	0.0099871
ENSMUSG00000025153	Fasn	fatty acid synthase [Source:MGI Symbol;Acc:MGI:95485]	372.642	0.486111	0.000890654	0.0399031
ENSMUSG00000032294	Pkm	pyruvate kinase, muscle [Source:MGI Symbol;Acc:MGI:97591]	509.712	0.448667	0.000305994	0.0191677
ENSMUSG00000049252	Lrp1b	low density lipoprotein-related protein 1B [Source:MGI Symbol;Acc:MGI:2151136]	754.023	0.418922	0.00023949	0.0160431
ENSMUSG00000002265	Peg3	paternally expressed 3 [Source:MGI Symbol;Acc:MGI:104748]	3281.99	-0.318462	0.00100433	0.0431334
ENSMUSG00000030209	Grin2b	glutamate receptor, ionotropic, NMDA2B (epsilon 2) [Source:MGI Symbol;Acc:MGI:95821]	585.228	-0.432034	0.000728516	0.0356171
ENSMUSG00000031748	Gnao1	guanine nucleotide binding protein, alpha O [Source:MGI Symbol;Acc:MGI:95775]	336.01	-0.496918	0.000943712	0.0413794
ENSMUSG00000029775	Klhdc10	kelch domain containing 10 [Source:MGI Symbol;Acc:MGI:1924038]	311.783	-0.512818	0.00047522	0.0259592
ENSMUSG00000014592	Camta1	calmodulin binding transcription activator 1 [Source:MGI Symbol;Acc:MGI:2140230]	423.411	-0.534033	0.000600889	0.0309236
ENSMUSG00000004980	Hnrnpa2b1	heterogeneous nuclear ribonucleoprotein A2/B1 [Source:MGI Symbol;Acc:MGI:104819]	384.307	-0.540073	0.000506147	0.0270443
ENSMUSG00000117286		predicted gene 1043 [Source:MGI Symbol;Acc:MGI:2685889]	274.557	-0.548833	0.00077463	0.036948
ENSMUSG00000054640	Slc8a1	solute carrier family 8 (sodium/calcium exchanger), member 1 [Source:MGI Symbol;Acc:MGI:107956]	862.344	-0.581773	0.000934238	0.0411486
ENSMUSG00000058254	Tspan7	tetraspanin 7 [Source:MGI Symbol;Acc:MGI:1298407]	335.082	-0.617471	0.000163688	0.0124073
ENSMUSG00000026915	Strbp	spermatid perinuclear RNA binding protein [Source:MGI Symbol;Acc:MGI:104626]	314.675	-0.634139	7.43593e-05	0.00644994
ENSMUSG00000018909	Arrb1	arrestin, beta 1 [Source:MGI Symbol;Acc:MGI:99473]	218.417	-0.646923	0.000100374	0.0083174
ENSMUSG00000022791	Tnk2	tyrosine kinase, non-receptor, 2 [Source:MGI Symbol;Acc:MGI:1858308]	232.915	-0.650959	2.42264e-05	0.00263207
ENSMUSG00000058624	Gda	guanine deaminase [Source:MGI Symbol;Acc:MGI:95678]	336.521	-0.652823	0.000433859	0.0248086
ENSMUSG00000058756	Thra	thyroid hormone receptor alpha [Source:MGI Symbol;Acc:MGI:98742]	212.274	-0.655683	0.000359627	0.0217064
ENSMUSG00000035620	Ric8b	RIC8 guanine nucleotide exchange factor B [Source:MGI Symbol;Acc:MGI:2682307]	119.575	-0.68914	0.00110438	0.0455639
ENSMUSG00000021140	Pcnx	pecanex homolog [Source:MGI Symbol;Acc:MGI:1891924]	305.016	-0.692399	0.000428495	0.0247919
ENSMUSG00000035623	Rsf1	remodeling and spacing factor 1 [Source:MGI Symbol;Acc:MGI:2682305]	220.646	-0.707804	0.000443479	0.0248948
ENSMUSG00000055531	Cpsf6	cleavage and polyadenylation specific factor 6 [Source:MGI Symbol;Acc:MGI:1913948]	203.516	-0.715028	2.60945e-05	0.00276485
ENSMUSG00000037795	N4bp2	NEDD4 binding protein 2 [Source:MGI Symbol;Acc:MGI:2684414]	194.697	-0.719596	0.000815851	0.0379876
ENSMUSG00000022565	Plec	plectin [Source:MGI Symbol;Acc:MGI:1277961]	383.67	-0.729627	1.68405e-05	0.00193725
ENSMUSG00000021708	Rasgrf2	RAS protein-specific guanine nucleotide-releasing factor 2 [Source:MGI Symbol;Acc:MGI:109137]	304.373	-0.731421	8.10654e-05	0.00695313
ENSMUSG00000058589	Anks1b	ankyrin repeat and sterile alpha motif domain containing 1B [Source:MGI Symbol;Acc:MGI:1924781]	176.582	-0.743587	0.000172196	0.0126596
ENSMUSG00000020827	Mink1	misshapen-like kinase 1 (zebrafish) [Source:MGI Symbol;Acc:MGI:1355329]	144.409	-0.784885	0.000201942	0.0142057
ENSMUSG00000007739	Cct4	chaperonin containing Tcp1, subunit 4 (delta) [Source:MGI Symbol;Acc:MGI:104689]	132.158	-0.785825	0.000365747	0.0219403
ENSMUSG00000021578	Ccdc127	coiled-coil domain containing 127 [Source:MGI Symbol;Acc:MGI:1914683]	95.4366	-0.796554	0.00120915	0.0480612
ENSMUSG00000025607	Copg2	coatomer protein complex, subunit gamma 2 [Source:MGI Symbol;Acc:MGI:1858683]	265.946	-0.80527	0.000580736	0.0302044
ENSMUSG00000063810	Alms1	ALMS1, centrosome and basal body associated [Source:MGI Symbol;Acc:MGI:1934606]	109.734	-0.852107	0.000715036	0.0353112
ENSMUSG00000102697	Pcdhac2	protocadherin alpha subfamily C, 2 [Source:MGI Symbol;Acc:MGI:1891443]	171.656	-0.85438	0.000808358	0.0378188
ENSMUSG00000109162	2900027M19Rik	RIKEN cDNA 2900027M19 gene [Source:MGI Symbol;Acc:MGI:1920130]	126.839	-0.856651	0.0010605	0.0443142
ENSMUSG00000001260	Gabrg1	gamma-aminobutyric acid (GABA) A receptor, subunit gamma 1 [Source:MGI Symbol;Acc:MGI:103156]	137.393	-0.871338	0.000886416	0.0399031
ENSMUSG00000027676	Ccdc39	coiled-coil domain containing 39 [Source:MGI Symbol;Acc:MGI:1289263]	119.91	-0.884873	0.000387076	0.0226776
ENSMUSG00000055430	Nap1l5	nucleosome assembly protein 1-like 5 [Source:MGI Symbol;Acc:MGI:1923555]	1315.26	-0.885959	5.16314e-10	2.01941e-07
ENSMUSG00000025094	Slc18a2	solute carrier family 18 (vesicular monoamine), member 2 [Source:MGI Symbol;Acc:MGI:106677]	333.05	-0.899799	0.0012512	0.0491791
ENSMUSG00000053646	Plxnb1	plexin B1 [Source:MGI Symbol;Acc:MGI:2154238]	147.773	-0.918202	3.36577e-06	0.000470769
ENSMUSG00000051855	Mest	mesoderm specific transcript [Source:MGI Symbol;Acc:MGI:96968]	234.689	-0.948465	6.50062e-05	0.00588547
ENSMUSG00000032625	Thsd7a	thrombospondin, type I, domain containing 7A [Source:MGI Symbol;Acc:MGI:2685683]	110.67	-0.949801	0.000626809	0.0318868
ENSMUSG00000052364	B630019K06Rik	RIKEN cDNA B630019K06 gene [Source:MGI Symbol;Acc:MGI:2147918]	109.336	-0.96755	0.000558621	0.0293667
ENSMUSG00000023032	Slc4a8	solute carrier family 4 (anion exchanger), member 8 [Source:MGI Symbol;Acc:MGI:1928745]	241.911	-0.976193	3.74779e-07	6.47087e-05
ENSMUSG00000037119	Fam91a1	family with sequence similarity 91, member A1 [Source:MGI Symbol;Acc:MGI:1277178]	149.762	-0.984564	0.000786091	0.0373126
ENSMUSG00000020674	Pxdn	peroxidasin [Source:MGI Symbol;Acc:MGI:1916925]	84.3747	-0.986595	0.000591752	0.0306146
ENSMUSG00000049511	Htr1b	5-hydroxytryptamine (serotonin) receptor 1B [Source:MGI Symbol;Acc:MGI:96274]	90.0413	-1.00421	0.000447775	0.0248948
ENSMUSG00000023092	Fhl1	four and a half LIM domains 1 [Source:MGI Symbol;Acc:MGI:1298387]	154.936	-1.00933	8.6062e-05	0.00731752
ENSMUSG00000041773	Enc1	ectodermal-neural cortex 1 [Source:MGI Symbol;Acc:MGI:109610]	167.739	-1.02074	3.3702e-06	0.000470769
ENSMUSG00000002266	Zim1	zinc finger, imprinted 1 [Source:MGI Symbol;Acc:MGI:1341879]	282.608	-1.05966	3.46277e-07	6.27018e-05
ENSMUSG00000040929	Rfx3	regulatory factor X, 3 (influences HLA class II expression) [Source:MGI Symbol;Acc:MGI:106582]	167.006	-1.0707	1.38401e-06	0.000214807
ENSMUSG00000041769	Ppp2r2d	protein phosphatase 2, regulatory subunit B, delta [Source:MGI Symbol;Acc:MGI:1289252]	65.8971	-1.0717	0.000711301	0.0353051
ENSMUSG00000031652	N4bp1	NEDD4 binding protein 1 [Source:MGI Symbol;Acc:MGI:2136825]	172.896	-1.07729	0.0011697	0.0474416
ENSMUSG00000036699	Zcchc12	zinc finger, CCHC domain containing 12 [Source:MGI Symbol;Acc:MGI:1919943]	726.791	-1.07834	6.792e-11	3.49538e-08
ENSMUSG00000022494	Shisa9	shisa family member 9 [Source:MGI Symbol;Acc:MGI:1919805]	92.1492	-1.0804	0.000474946	0.0259592
ENSMUSG00000066735	Vkorc1l1	vitamin K epoxide reductase complex, subunit 1-like 1 [Source:MGI Symbol;Acc:MGI:1916818]	127.551	-1.08764	0.000973375	0.0421135
ENSMUSG00000109321	A330076H08Rik	RIKEN cDNA A330076H08 gene [Source:MGI Symbol;Acc:MGI:2443193]	134.501	-1.08794	0.000185635	0.0134455
ENSMUSG00000032468	Armc8	armadillo repeat containing 8 [Source:MGI Symbol;Acc:MGI:1921375]	148.549	-1.1228	0.00125236	0.0491791
ENSMUSG00000029804	Herc3	hect domain and RLD 3 [Source:MGI Symbol;Acc:MGI:1921248]	346.382	-1.12886	2.02075e-11	1.16229e-08
ENSMUSG00000109239	Gm45176	predicted gene 45176 [Source:MGI Symbol;Acc:MGI:5753752]	70.3054	-1.12956	0.000433809	0.0248086
ENSMUSG00000112280	A830082N09Rik	RIKEN cDNA A830082N09 gene [Source:MGI Symbol;Acc:MGI:3041184]	72.8035	-1.15034	0.000260172	0.0168474
ENSMUSG00000103770	Pcdha9	protocadherin alpha 9 [Source:MGI Symbol;Acc:MGI:2447322]	106.734	-1.16025	0.000497565	0.0267318
ENSMUSG00000031111	Igsf1	immunoglobulin superfamily, member 1 [Source:MGI Symbol;Acc:MGI:2147913]	160.014	-1.17116	7.57272e-06	0.000937291
ENSMUSG00000026163	Sphkap	SPHK1 interactor, AKAP domain containing [Source:MGI Symbol;Acc:MGI:1924879]	180.593	-1.17475	6.61311e-06	0.000839779
ENSMUSG00000109125	Gm45159	predicted gene 45159 [Source:MGI Symbol;Acc:MGI:5753735]	254.28	-1.17589	1.04218e-07	2.26454e-05
ENSMUSG00000059742	Kcnh7	potassium voltage-gated channel, subfamily H (eag-related), member 7 [Source:MGI Symbol;Acc:MGI:2159566]	80.4841	-1.17777	0.000386396	0.0226776
ENSMUSG00000102206	Pcdha11	protocadherin alpha 11 [Source:MGI Symbol;Acc:MGI:1298372]	111.992	-1.20058	0.00110927	0.0455732
ENSMUSG00000042675	Ypel3	yippee like 3 [Source:MGI Symbol;Acc:MGI:1913340]	62.2513	-1.21359	0.000771552	0.036948
ENSMUSG00000070047	Fat1	FAT atypical cadherin 1 [Source:MGI Symbol;Acc:MGI:109168]	69.3937	-1.25296	5.02487e-05	0.00477021
ENSMUSG00000031210	Gpr165	G protein-coupled receptor 165 [Source:MGI Symbol;Acc:MGI:1923456]	83.3437	-1.28607	0.000932337	0.0411486
ENSMUSG00000000632	Sez6	seizure related gene 6 [Source:MGI Symbol;Acc:MGI:104745]	104.319	-1.29867	2.09777e-05	0.0023577
ENSMUSG00000021032	Ngb	neuroglobin [Source:MGI Symbol;Acc:MGI:2151886]	91.8711	-1.30458	0.00101459	0.0431334
ENSMUSG00000110246	C130073E24Rik	RIKEN cDNA C130073E24 gene [Source:MGI Symbol;Acc:MGI:2442759]	86.3594	-1.31218	0.000190045	0.0135639
ENSMUSG00000026748	Plxdc2	plexin domain containing 2 [Source:MGI Symbol;Acc:MGI:1914698]	94.4778	-1.36676	6.24949e-05	0.00571098
ENSMUSG00000041912	Tdrkh	tudor and KH domain containing protein [Source:MGI Symbol;Acc:MGI:1919884]	51.2881	-1.36889	0.000439282	0.0248948
ENSMUSG00000017057	Il13ra1	interleukin 13 receptor, alpha 1 [Source:MGI Symbol;Acc:MGI:105052]	90.3001	-1.41373	0.000224147	0.0153817
ENSMUSG00000020703	5530401A14Rik	RIKEN cDNA 5530401A14 gene [Source:MGI Symbol;Acc:MGI:1918638]	89.1668	-1.44044	1.72353e-06	0.000263323
ENSMUSG00000019906	Lin7a	lin-7 homolog A, crumbs cell polarity complex component [Source:MGI Symbol;Acc:MGI:2135609]	79.0256	-1.45745	5.51148e-05	0.00518185
ENSMUSG00000092035	Peg10	paternally expressed 10 [Source:MGI Symbol;Acc:MGI:2157785]	341.687	-1.49152	3.71317e-22	9.07683e-19
ENSMUSG00000044288	Cnr1	cannabinoid receptor 1 (brain) [Source:MGI Symbol;Acc:MGI:104615]	121.785	-1.52109	1.03007e-10	4.79622e-08
ENSMUSG00000062760	1810041L15Rik	shisa like 1 [Source:MGI Symbol;Acc:MGI:1919551]	131.196	-1.55053	1.02895e-10	4.79622e-08
ENSMUSG00000052137	Rbm12b2	RNA binding motif protein 12 B2 [Source:MGI Symbol;Acc:MGI:1924854]	29.7639	-1.57102	0.00121908	0.0482597
ENSMUSG00000051379	Flrt3	fibronectin leucine rich transmembrane protein 3 [Source:MGI Symbol;Acc:MGI:1918686]	79.6548	-1.59011	8.74005e-05	0.00736726
ENSMUSG00000042581	Thsd7b	thrombospondin, type I, domain containing 7B [Source:MGI Symbol;Acc:MGI:2443925]	84.8144	-1.77238	1.09557e-08	2.97569e-06
ENSMUSG00000020034	Tcp11l2	t-complex 11 (mouse) like 2 [Source:MGI Symbol;Acc:MGI:2444679]	23.9042	-1.8881	0.00103981	0.0436363
ENSMUSG00000109874	Gm9911	predicted gene 9911 [Source:MGI Symbol;Acc:MGI:3708772]	24.6431	-1.94812	0.001186	0.047723
ENSMUSG00000017756	Slc12a7	solute carrier family 12, member 7 [Source:MGI Symbol;Acc:MGI:1342283]	28.7405	-2.02099	7.4539e-05	0.00644994
ENSMUSG00000031212	Pgr15l	G protein-coupled receptor 15-like [Source:MGI Symbol;Acc:MGI:2676330]	49.7029	-2.14644	7.28062e-08	1.65558e-05
ENSMUSG00000030359	Pzp	PZP, alpha-2-macroglobulin like [Source:MGI Symbol;Acc:MGI:87854]	22.4585	-2.22122	0.000485969	0.0263989
ENSMUSG00000040167	Ikzf5	IKAROS family zinc finger 5 [Source:MGI Symbol;Acc:MGI:1914393]	45.3156	-2.22998	0.000373931	0.0222945
ENSMUSG00000019935	Slc17a8	solute carrier family 17 (sodium-dependent inorganic phosphate cotransporter), member 8 [Source:MGI Symbol;Acc:MGI:3039629]	57.6398	-2.36361	3.77213e-07	6.47087e-05
ENSMUSG00000033450	Tagap	T cell activation Rho GTPase activating protein [Source:MGI Symbol;Acc:MGI:3615484]	20.1206	-2.40633	0.000845147	0.0389804
ENSMUSG00000020953	Coch	cochlin [Source:MGI Symbol;Acc:MGI:1278313]	34.1438	-2.42788	8.91748e-06	0.00107648
ENSMUSG00000022076	Klhl1	kelch-like 1 [Source:MGI Symbol;Acc:MGI:2136335]	22.6102	-2.50206	0.000165828	0.0124728
ENSMUSG00000105970	Gm43360	predicted gene 43360 [Source:MGI Symbol;Acc:MGI:5663497]	15.7813	-2.84324	0.000242829	0.0160431
ENSMUSG00000028004	Npy2r	neuropeptide Y receptor Y2 [Source:MGI Symbol;Acc:MGI:108418]	154.912	-3.06692	5.48618e-19	1.07288e-15
ENSMUSG00000081889	Gm13188	predicted gene 13188 [Source:MGI Symbol;Acc:MGI:3650857]	15.7662	-3.27045	0.000207878	0.0145188
ENSMUSG00000061371	Zfp873	zinc finger protein 873 [Source:MGI Symbol;Acc:MGI:3040689]	20.9431	-3.47839	2.51347e-07	4.81896e-05
ENSMUSG00000027971	Ndst4	N-deacetylase/N-sulfotransferase (heparin glucosaminyl) 4 [Source:MGI Symbol;Acc:MGI:1932545]	65.2591	-3.49882	2.20425e-12	1.43688e-09
ENSMUSG00000041734	Kirrel	kirre like nephrin family adhesion molecule 1 [Source:MGI Symbol;Acc:MGI:1891396]	35.0179	-3.53135	3.3081e-08	8.51227e-06
ENSMUSG00000103646	Gm37706	predicted gene, 37706 [Source:MGI Symbol;Acc:MGI:5610934]	21.5261	-3.54469	0.000319151	0.0196268

## Sheet: Table 2
Table 2. Significantly altered functional biological process GO terms revealed by overrepresentation analysis (ORA)
ID	Description	GeneRatio	BgRatio	pvalue	p.adjust	qvalue	geneID	Count
GO:0042391	regulation of membrane potential	20/226	469/22316	7.33195e-08	3.81384e-05	3.20033e-05	Chrna7/Insyn1/Hcn1/Prkn/Scn5a/Atp1a1/Kcnk9/Pten/Dpp6/Ntrk2/App/Grin2b/Slc8a1/Gabrg1/Slc4a8/Fhl1/Kcnh7/Sez6/Cnr1/Npy2r	20
GO:0050808	synapse organization	15/226	493/22316	0.000162715	0.00881558	0.00739748	Ghsr/Chrna7/Nrp1/Sipa1l1/Cadm1/Il1rap/Pten/Ctnna2/Sez6l/Ntrk2/App/Grin2b/Plxnb1/Sez6/Flrt3	15
GO:0015850	organic hydroxy compound transport	13/226	254/22316	2.098e-06	0.000595261	0.000499506	Ghsr/Chrna7/Syt6/Prkn/Maob/Prkcb/Emb/Pcp4/Chga/Slc18a2/Htr1b/Cnr1/Npy2r	13
GO:0015833	peptide transport	13/226	320/22316	2.51091e-05	0.00336193	0.00282112	Sytl4/Kiss1/Ghsr/Prkn/Vgf/Chga/Ptprn/Abcc5/Arrb1/Slc18a2/Rfx3/Cnr1/Npy2r	13
GO:0042886	amide transport	13/226	353/22316	6.87135e-05	0.00595708	0.00499881	Sytl4/Kiss1/Ghsr/Prkn/Vgf/Chga/Ptprn/Abcc5/Arrb1/Slc18a2/Rfx3/Cnr1/Npy2r	13
GO:0050890	cognition	13/226	357/22316	7.69779e-05	0.00632231	0.00530529	Nts/Ghsr/Chrna7/Prkn/Gmfb/Specc1/Chl1/Pten/Ntrk2/App/Grin2b/Thra/Cnr1	13
GO:0046879	hormone secretion	13/226	370/22316	0.000110077	0.00819556	0.0068772	Nmb/Sytl4/Kiss1/Ghsr/Prkn/Vgf/Nell2/Chga/Ptprn/Arrb1/Slc18a2/Rfx3/Cnr1	13
GO:0009914	hormone transport	13/226	378/22316	0.000136045	0.00881558	0.00739748	Nmb/Sytl4/Kiss1/Ghsr/Prkn/Vgf/Nell2/Chga/Ptprn/Arrb1/Slc18a2/Rfx3/Cnr1	13
GO:1904062	regulation of cation transmembrane transport	13/226	381/22316	0.000147062	0.00881558	0.00739748	Hcn1/Kcns2/Scn5a/Calm1/Klhl24/Pten/Dpp6/App/Slc8a1/Rasgrf2/Mink1/Fhl1/Shisa9	13
GO:0015844	monoamine transport	12/226	105/22316	7.4041e-10	2.31082e-06	1.9391e-06	Ghsr/Chrna7/Syt6/Prkn/Maob/Prkcb/Pcp4/Chga/Slc18a2/Htr1b/Cnr1/Npy2r	12
GO:0007626	locomotory behavior	12/226	264/22316	1.7197e-05	0.00255579	0.00214466	Ghsr/Prkn/Penk/Gmfb/Chl1/Pten/Sez6l/App/Gnao1/Slc18a2/Sez6/Klhl1	12
GO:0002790	peptide secretion	12/226	298/22316	5.60992e-05	0.00514958	0.0043212	Sytl4/Kiss1/Ghsr/Prkn/Vgf/Chga/Ptprn/Arrb1/Slc18a2/Rfx3/Cnr1/Npy2r	12
GO:0048511	rhythmic process	12/226	307/22316	7.45377e-05	0.00628736	0.00527595	Nrip1/Kiss1/Pgr/Chrna7/Enpp2/Maged1/Ptprn/Pten/Ntrk2/Grin2b/Arrb1/Npy2r	12
GO:0007611	learning or memory	12/226	320/22316	0.000110289	0.00819556	0.0068772	Nts/Ghsr/Chrna7/Prkn/Gmfb/Specc1/Pten/Ntrk2/App/Grin2b/Thra/Cnr1	12
GO:0015837	amine transport	11/226	121/22316	4.33308e-08	2.70471e-05	2.26962e-05	Ghsr/Chrna7/Syt6/Prkcb/Pcp4/Chga/Grin2b/Slc18a2/Htr1b/Cnr1/Npy2r	11
GO:0071805	potassium ion transmembrane transport	11/226	205/22316	8.27708e-06	0.00151957	0.00127513	Hcn1/Kcns2/Calm1/Atp1a1/Kcnk9/Klhl24/Pten/Dpp6/Fhl1/Kcnh7/Slc12a7	11
GO:0006813	potassium ion transport	11/226	242/22316	3.86612e-05	0.00419233	0.00351794	Hcn1/Kcns2/Calm1/Atp1a1/Kcnk9/Klhl24/Pten/Dpp6/Fhl1/Kcnh7/Slc12a7	11
GO:0001505	regulation of neurotransmitter levels	11/226	254/22316	5.98932e-05	0.00534076	0.00448163	Chrna7/Syt6/Prkn/Maob/Prkcb/Gad2/Ntrk2/Slc18a2/Slc4a8/Htr1b/Lin7a	11
GO:0050803	regulation of synapse structure or activity	11/226	271/22316	0.000106647	0.00819556	0.0068772	Ghsr/Chrna7/Sipa1l1/Il1rap/Pten/Ctnna2/Ntrk2/App/Grin2b/Flrt3/Slc17a8	11
GO:0030072	peptide hormone secretion	11/226	290/22316	0.000192764	0.00986258	0.00827606	Sytl4/Kiss1/Ghsr/Prkn/Vgf/Chga/Ptprn/Arrb1/Slc18a2/Rfx3/Cnr1	11
GO:0051937	catecholamine transport	10/226	88/22316	2.1062e-08	2.70471e-05	2.26962e-05	Ghsr/Chrna7/Syt6/Prkn/Prkcb/Pcp4/Chga/Htr1b/Cnr1/Npy2r	10
GO:0051952	regulation of amine transport	10/226	116/22316	2.97417e-07	0.000132606	0.000111274	Ghsr/Chrna7/Syt6/Prkcb/Pcp4/Chga/Grin2b/Htr1b/Cnr1/Npy2r	10
GO:0030073	insulin secretion	10/226	234/22316	0.000144417	0.00881558	0.00739748	Sytl4/Ghsr/Prkn/Vgf/Chga/Ptprn/Arrb1/Slc18a2/Rfx3/Cnr1	10
GO:0030100	regulation of endocytosis	10/226	235/22316	0.000149522	0.00881558	0.00739748	Ptpn5/Dgkd/Clu/Pard3/Cdh13/Pten/Aak1/App/Arrb1/Tnk2	10
GO:0006836	neurotransmitter transport	10/226	242/22316	0.000189695	0.00986258	0.00827606	Chrna7/Syt6/Prkn/Prkcb/Ntrk2/Slc18a2/Slc4a8/Htr1b/Lin7a/Slc17a8	10
GO:0050433	regulation of catecholamine secretion	9/226	68/22316	2.80382e-08	2.70471e-05	2.26962e-05	Ghsr/Chrna7/Syt6/Prkcb/Pcp4/Chga/Htr1b/Cnr1/Npy2r	9
GO:0050432	catecholamine secretion	9/226	71/22316	4.12726e-08	2.70471e-05	2.26962e-05	Ghsr/Chrna7/Syt6/Prkcb/Pcp4/Chga/Htr1b/Cnr1/Npy2r	9
GO:0099565	chemical synaptic transmission, postsynaptic	9/226	103/22316	1.05096e-06	0.000364448	0.000305822	Chrna7/Insyn1/Prkn/Pten/App/Grin2b/Anks1b/Sez6/Npy2r	9
GO:0060078	regulation of postsynaptic membrane potential	9/226	118/22316	3.2838e-06	0.000788364	0.000661546	Chrna7/Insyn1/Prkn/Pten/App/Grin2b/Gabrg1/Sez6/Npy2r	9
GO:0030534	adult behavior	9/226	189/22316	0.000138219	0.00881558	0.00739748	Ghsr/Chrna7/Prkn/Chl1/Pten/Sez6l/App/Sez6/Klhl1	9
GO:0007416	synapse assembly	9/226	192/22316	0.000155642	0.00881558	0.00739748	Ghsr/Sipa1l1/Cadm1/Il1rap/Pten/Ntrk2/App/Plxnb1/Flrt3	9
GO:0031644	regulation of nervous system process	9/226	194/22316	0.000168246	0.00889993	0.00746826	Ghsr/Chrna7/Prkn/Pard3/Pten/App/Grin2b/Shisa9/Npy2r	9
GO:0042982	amyloid precursor protein metabolic process	8/226	75/22316	9.20379e-07	0.000359063	0.000301303	Chrna7/Gsap/Clu/Itm2c/Tmcc2/Olfm1/Ntrk2/App	8
GO:0035249	synaptic transmission, glutamatergic	8/226	117/22316	2.58527e-05	0.00336193	0.00282112	Hcn1/Prkn/Ntrk2/Grin2b/Htr1b/Cnr1/Slc17a8/Npy2r	8
GO:0048259	regulation of receptor-mediated endocytosis	8/226	126/22316	4.4049e-05	0.00429616	0.00360506	Ptpn5/Dgkd/Clu/Pard3/Aak1/App/Arrb1/Tnk2	8
GO:0001508	action potential	8/226	147/22316	0.000130343	0.00881558	0.00739748	Chrna7/Hcn1/Scn5a/Dpp6/Ntrk2/Grin2b/Kcnh7/Cnr1	8
GO:0015872	dopamine transport	7/226	58/22316	1.93026e-06	0.000595261	0.000499506	Syt6/Prkn/Prkcb/Pcp4/Htr1b/Cnr1/Npy2r	7
GO:0042698	ovulation cycle	7/226	62/22316	3.05072e-06	0.000788364	0.000661546	Nrip1/Kiss1/Pgr/Chrna7/Enpp2/Ptprn/Arrb1	7
GO:0051966	regulation of synaptic transmission, glutamatergic	7/226	85/22316	2.51427e-05	0.00336193	0.00282112	Hcn1/Prkn/Ntrk2/Grin2b/Htr1b/Cnr1/Npy2r	7
GO:0060079	excitatory postsynaptic potential	7/226	92/22316	4.20325e-05	0.00426583	0.00357962	Chrna7/Prkn/Pten/App/Grin2b/Sez6/Npy2r	7
GO:0007156	homophilic cell adhesion via plasma membrane adhesion molecules	7/226	112/22316	0.000146535	0.00881558	0.00739748	Nectin3/Emb/Cdh13/Cadm1/Pcdh1/Pcdha10/Pcdha9	7
GO:0031532	actin cytoskeleton reorganization	7/226	114/22316	0.000163618	0.00881558	0.00739748	Ezr/Nrp1/Sipa1l1/Plec/Mink1/Thsd7a/Thsd7b	7
GO:0014046	dopamine secretion	6/226	42/22316	3.90494e-06	0.000812488	0.000681789	Syt6/Prkcb/Pcp4/Htr1b/Cnr1/Npy2r	6
GO:0014059	regulation of dopamine secretion	6/226	42/22316	3.90494e-06	0.000812488	0.000681789	Syt6/Prkcb/Pcp4/Htr1b/Cnr1/Npy2r	6
GO:1902991	regulation of amyloid precursor protein catabolic process	6/226	45/22316	5.91151e-06	0.00115311	0.00096762	Chrna7/Gsap/Clu/Olfm1/Ntrk2/App	6
GO:0022602	ovulation cycle process	6/226	50/22316	1.10567e-05	0.00181621	0.00152405	Nrip1/Kiss1/Pgr/Chrna7/Ptprn/Arrb1	6
GO:0007617	mating behavior	6/226	52/22316	1.39285e-05	0.00217354	0.00182389	Pgr/Vgf/Pten/App/Thra/Cnr1	6
GO:0042987	amyloid precursor protein catabolic process	6/226	60/22316	3.20188e-05	0.00384348	0.00322521	Chrna7/Gsap/Clu/Olfm1/Ntrk2/App	6
GO:0098815	modulation of excitatory postsynaptic potential	6/226	60/22316	3.20188e-05	0.00384348	0.00322521	Chrna7/Prkn/Pten/App/Grin2b/Npy2r	6
GO:0048260	positive regulation of receptor-mediated endocytosis	6/226	63/22316	4.23713e-05	0.00426583	0.00357962	Ptpn5/Dgkd/Clu/Pard3/App/Arrb1	6
GO:0019098	reproductive behavior	6/226	66/22316	5.52476e-05	0.00514958	0.0043212	Pgr/Vgf/Pten/App/Thra/Cnr1	6
GO:0001964	startle response	5/226	37/22316	3.41088e-05	0.00394272	0.00330849	Prkn/Penk/Pten/Ctnna2/Grin2b	5
GO:1902003	regulation of amyloid-beta formation	5/226	38/22316	3.89547e-05	0.00419233	0.00351794	Chrna7/Gsap/Clu/Olfm1/Ntrk2	5
GO:0034205	amyloid-beta formation	5/226	48/22316	0.000122397	0.00868185	0.00728527	Chrna7/Gsap/Clu/Olfm1/Ntrk2	5
GO:0008038	neuron recognition	5/226	51/22316	0.000163827	0.00881558	0.00739748	Crtac1/Nrp1/Emb/App/Cnr1	5
GO:0045933	positive regulation of muscle contraction	5/226	51/22316	0.000163827	0.00881558	0.00739748	Ghsr/Eno1/Chga/Atp1a1/Npy2r	5
GO:0051967	negative regulation of synaptic transmission, glutamatergic	4/226	14/22316	9.46823e-06	0.00164169	0.0013776	Hcn1/Prkn/Htr1b/Npy2r	4
GO:1902993	positive regulation of amyloid precursor protein catabolic process	4/226	25/22316	0.000109628	0.00819556	0.0068772	Chrna7/Gsap/Clu/App	4
GO:0006837	serotonin transport	4/226	27/22316	0.000149696	0.00881558	0.00739748	Maob/Slc18a2/Htr1b/Cnr1	4
GO:0014062	regulation of serotonin secretion	3/226	10/22316	0.000116705	0.0084706	0.007108	Maob/Htr1b/Cnr1	3
GO:1903599	positive regulation of autophagy of mitochondrion	3/226	11/22316	0.00015927	0.00881558	0.00739748	Prkn/Cers1/Vps13d	3
